# Supplementary material for: Impact of the Pre-Transplant Circulatory Supportive Strategy on Post-Transplant Outcome: Double Bridge May Work
Source: MDPI journal article supplement (doi:10.3390/jcm10204697), 2021-10-13
Supplement: s1 [file s1]

**Table S1. Key hepatic and renal biomarkers in the study group after transplantation.**

|                                   | Without MCS   | With MCS      | <i>p</i> | Total         |
|-----------------------------------|---------------|---------------|----------|---------------|
| Patient, n (%)                    | 115 (45.8)    | 136 (54.2)    |          | 251           |
| Total Bilirubin, (mg/dL $\pm$ SD) |               |               |          |               |
| Time of index admission           | 1.9 $\pm$ 1.4 | 2.6 $\pm$ 2.8 | 0.042    | 2.3 $\pm$ 2.3 |
| Pre-HTx                           | 2.6 $\pm$ 8.3 | 3.1 $\pm$ 4.3 | 0.551    | 2.9 $\pm$ 6.3 |
| 1-month after HTx                 | 1.4 $\pm$ 4.9 | 1.4 $\pm$ 2.7 | 0.884    | 1.4 $\pm$ 3.9 |
| 3-month after HTx                 | 0.7 $\pm$ 0.3 | 1.3 $\pm$ 4.4 | 0.187    | 1.0 $\pm$ 3.2 |
| 6-month after HTx                 | 0.8 $\pm$ 0.5 | 0.7 $\pm$ 0.4 | 0.025    | 0.8 $\pm$ 0.4 |
| 9-month after HTx                 | 0.8 $\pm$ 0.4 | 0.7 $\pm$ 0.3 | 0.011    | 0.7 $\pm$ 0.3 |
| 1-year after HTx                  | 0.8 $\pm$ 0.5 | 0.7 $\pm$ 0.4 | 0.200    | 0.8 $\pm$ 0.4 |
| 3-year after Htx                  | 0.7 $\pm$ 0.3 | 0.7 $\pm$ 0.3 | 0.617    | 0.7 $\pm$ 0.3 |
| Creatinine, (mg/dL $\pm$ SD)      |               |               |          |               |

|                         |           |           |       |           |
|-------------------------|-----------|-----------|-------|-----------|
| Time of index admission | 1.6 ± 1.7 | 1.7 ± 1.0 | 0.394 | 1.6 ± 1.3 |
| Pre-HTx                 | 1.5 ± 1.6 | 1.5 ± 1.0 | 0.941 | 1.5 ± 1.3 |
| 1-month after HTx       | 1.5 ± 1.4 | 1.5 ± 1.0 | 0.796 | 1.5 ± 1.2 |
| 3-month after HTx       | 1.5 ± 1.2 | 1.8 ± 1.4 | 0.110 | 1.6 ± 1.3 |
| 6-month after HTx       | 1.7 ± 1.8 | 1.9 ± 1.6 | 0.388 | 1.8 ± 1.7 |
| 9-month after HTx       | 1.7± 1.7  | 1.9 ± 1.7 | 0.306 | 1.8± 1.7  |
| 1-year after HTx        | 1.6 ± 1.7 | 1.9 ± 1.7 | 0.300 | 1.7 ± 1.7 |
| 3-year after Htx        | 1.7± 2.0  | 1.7± 1.4  | 0.915 | 1.7 ± 1.8 |

HTx: heart transplantation, MCS: mechanical circulatory support, SD: standard deviation.

**Table S2. Creatinine and Bilirubin data of MCS bridge to HTx subgroups.**

|  | IABP | ECMO | ECMO-VAD | VAD | <i>p</i> | Total |
|--|------|------|----------|-----|----------|-------|
|  |      |      |          |     |          |       |

|                                     |           |           |                               |           |       |           |
|-------------------------------------|-----------|-----------|-------------------------------|-----------|-------|-----------|
| Patient, n (%)                      | 15 (11)   | 33 (24.3) | 59 (43.4)                     | 29 (21.3) |       | 136       |
| <b>Creatinine, (mg/dL mean± SD)</b> |           |           |                               |           |       |           |
| Time of admission                   | 1.7 ± 1.2 | 1.8 ± 0.9 | 1.6 ± 0.9                     | 1.7 ± 1.1 | 0.872 | 1.7 ± 1.0 |
| Time of MCS                         | 1.6 ± 1.0 | 2.1 ± 1.0 | 1.7 ± 1.0 (E)<br>1.8 ± 1.0(V) | 2.1 ± 1.2 | 0.487 | 1.9 ± 1.1 |
| Pre-HTx                             | 1.3 ± 0.8 | 1.8 ± 1.2 | 1.4 ± 1.1                     | 1.3 ± 0.9 | 0.251 | 1.5 ± 1.0 |
| 1-month after HTx                   | 1.6 ± 1.1 | 1.4 ± 0.7 | 1.5 ± 1.0                     | 1.4 ± 1.2 | 0.927 | 1.5 ± 1.0 |
| 3-month after HTx                   | 1.9 ± 1.4 | 1.7 ± 0.8 | 1.9 ± 1.7                     | 1.6 ± 1.4 | 0.699 | 1.8 ± 1.4 |
| 6-month after HTx                   | 2.0 ± 2.2 | 1.9 ± 1.9 | 2.0 ± 1.6                     | 1.8 ± 1.3 | 0.955 | 1.9 ± 1.6 |
| 9-month after HTx                   | 2.2 ± 3.2 | 1.6 ± 0.7 | 1.8 ± 1.4                     | 2.1 ± 2.1 | 0.771 | 1.9 ± 1.7 |
| 1-year after HTx                    | 2.1 ± 2.7 | 1.5 ± 0.6 | 1.8 ± 1.5                     | 2.0 ± 2.0 | 0.769 | 1.9 ± 1.7 |
| 3-year after HTx                    | 1.3 ± 0.6 | 1.5 ± 0.6 | 1.6 ± 1.1                     | 2.2 ± 2.5 | 0.496 | 1.7 ± 1.4 |
| <b>Bilirubin, (mg/dL mean ± SD)</b> |           |           |                               |           |       |           |

|                   |           |           |           |           |       |           |
|-------------------|-----------|-----------|-----------|-----------|-------|-----------|
| Time of admission | 2.6 ± 1.8 | 3.1 ± 2.8 | 2.7 ± 3.5 | 1.9 ± 1.5 | 0.551 | 2.6 ± 2.8 |
| Time of MCS       | 3.4 ± 2.3 | 3.7 ± 4.7 | 2.3 ± 1.5 | 2.5 ± 1.8 | 0.298 | 2.9 ± 3.0 |
| Pre-HTx           | 1.5 ± 1.1 | 5.8 ± 6.9 | 2.5 ± 2.8 | 2.2 ± 2.2 | 0.000 | 3.1 ± 4.3 |
| 1-month after HTx | 0.6 ± 0.3 | 2.6 ± 4.9 | 1.0 ± 1.5 | 1.2 ± 1.8 | 0.056 | 1.4 ± 2.7 |
| 3-month after HTx | 0.6 ± 0.2 | 2.6 ± 8.8 | 1.0 ± 2.3 | 0.7 ± 0.5 | 0.378 | 1.3 ± 4.4 |
| 6-month after HTx | 0.7 ± 0.3 | 0.9 ± 0.5 | 0.7 ± 0.3 | 0.7 ± 0.3 | 0.179 | 0.8 ± 0.4 |
| 9-month after HTx | 0.9 ± 0.4 | 0.8 ± 0.3 | 0.6 ± 0.2 | 0.6 ± 0.2 | 0.001 | 0.7 ± 0.3 |
| 1-year after HTx  | 0.7 ± 0.4 | 0.9 ± 0.5 | 0.7 ± 0.3 | 0.8 ± 0.6 | 0.390 | 0.7 ± 0.4 |
| 3-year after HTx  | 0.7 ± 0.4 | 0.8 ± 0.3 | 0.7 ± 0.3 | 0.6 ± 0.2 | 0.128 | 0.7 ± 0.3 |

CPR\*: cardiopulmonary resuscitation, cardiac massage during waiting before transplantation, E: ECMO, ECMO: extracorporeal membrane oxygenation, H/D: hemodialysis,

HTx: heart transplantation, IABP: intra-aortic balloon pumping, ICMP: ischemic cardiomyopathy, MCS: mechanical circulatory support, SD: standard deviation, V: VAD,

ventricular assist device
